# Supplementary material
Source: PubMed Central journal article supplement (PMC5096903)

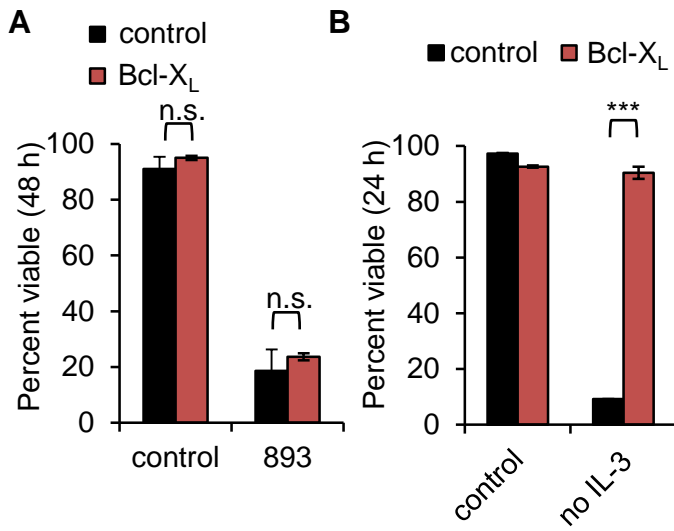

**Supplemental Figure 1: Blocking apoptosis does not prevent SH-BC-893-induced cell death. (A-B)** Viability of control or Bcl-X<sub>L</sub> over-expressing FL5.12 cells 24 h after SH-BC-893 (893) treatment (**A**) or IL-3 withdrawal (**B**). Means +/- SEM, n ≥ 3. Using Student's unpaired, two-tailed t-test, \*\*\*,  $P < 0.001$ ; n.s., not significant ( $P > 0.05$ ).

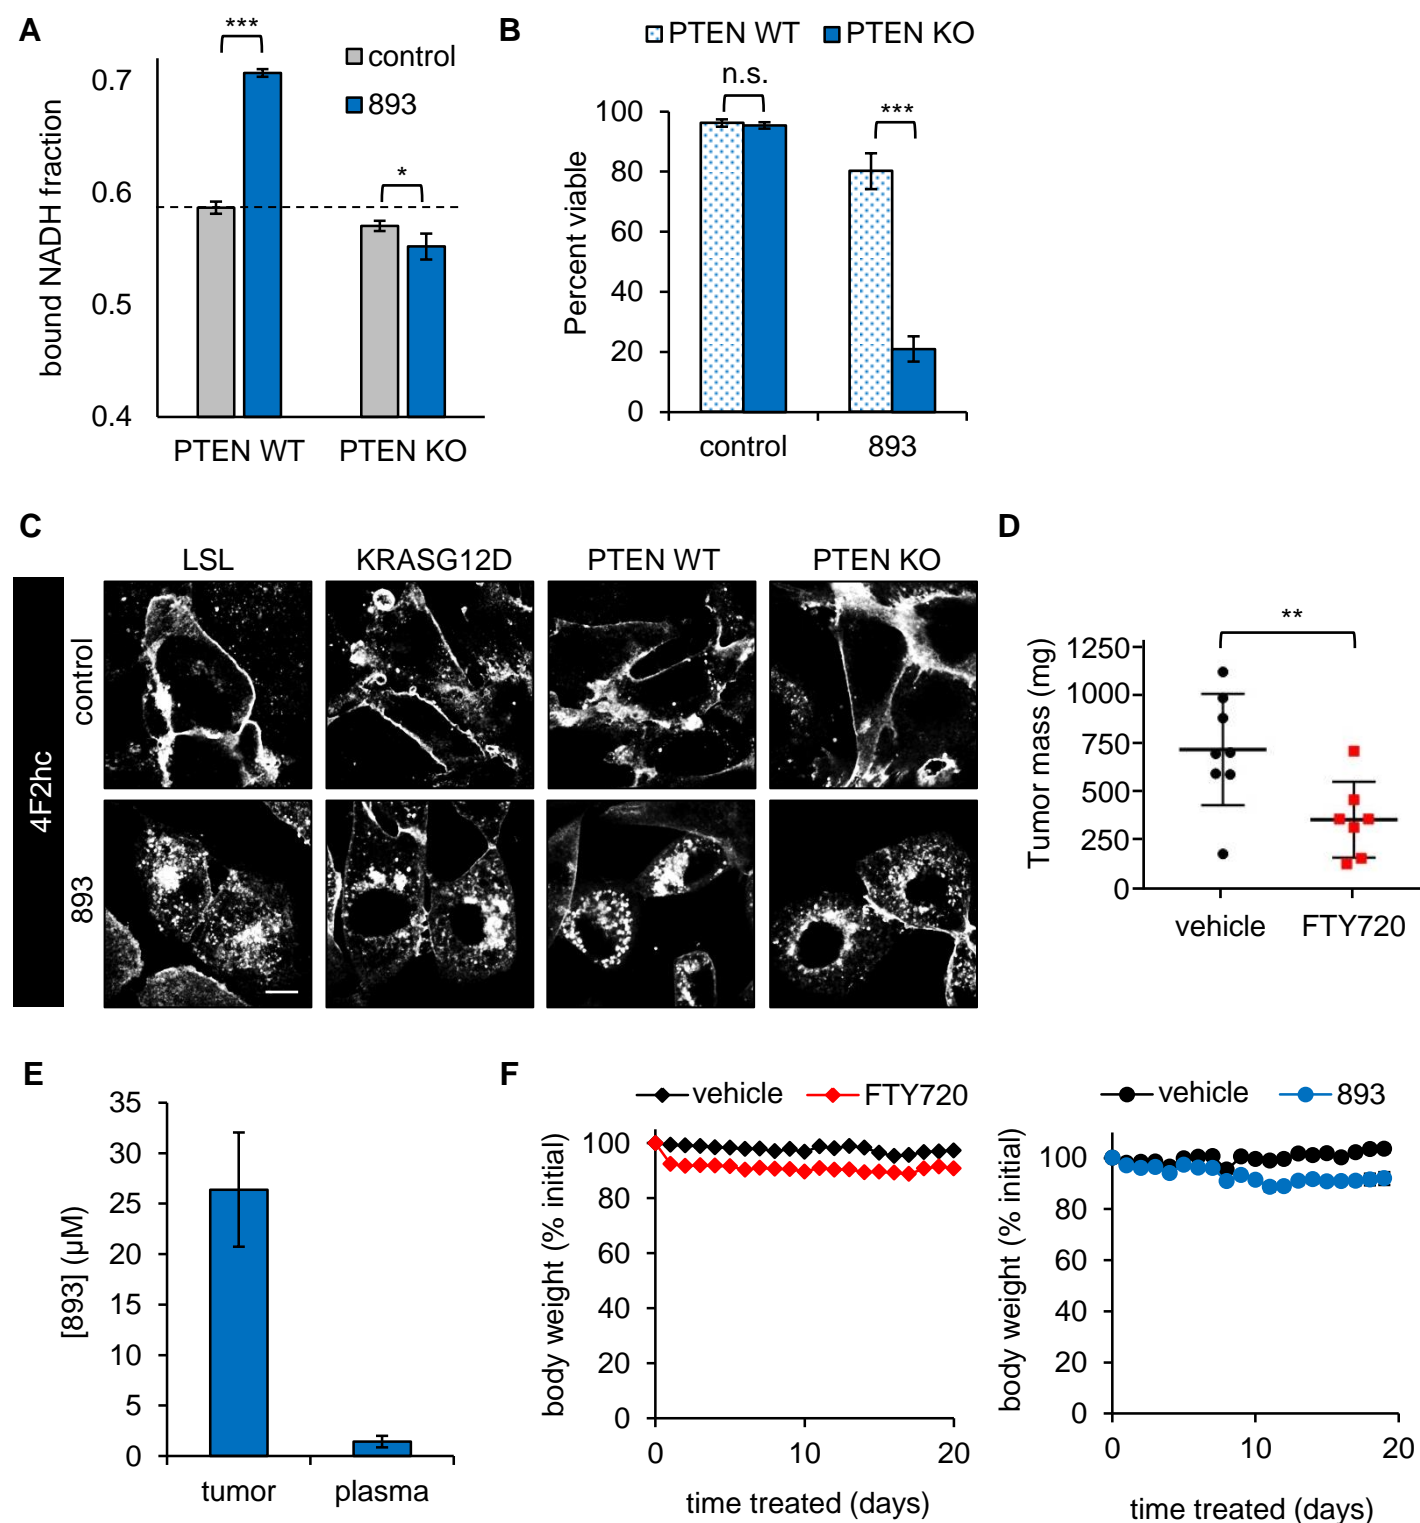

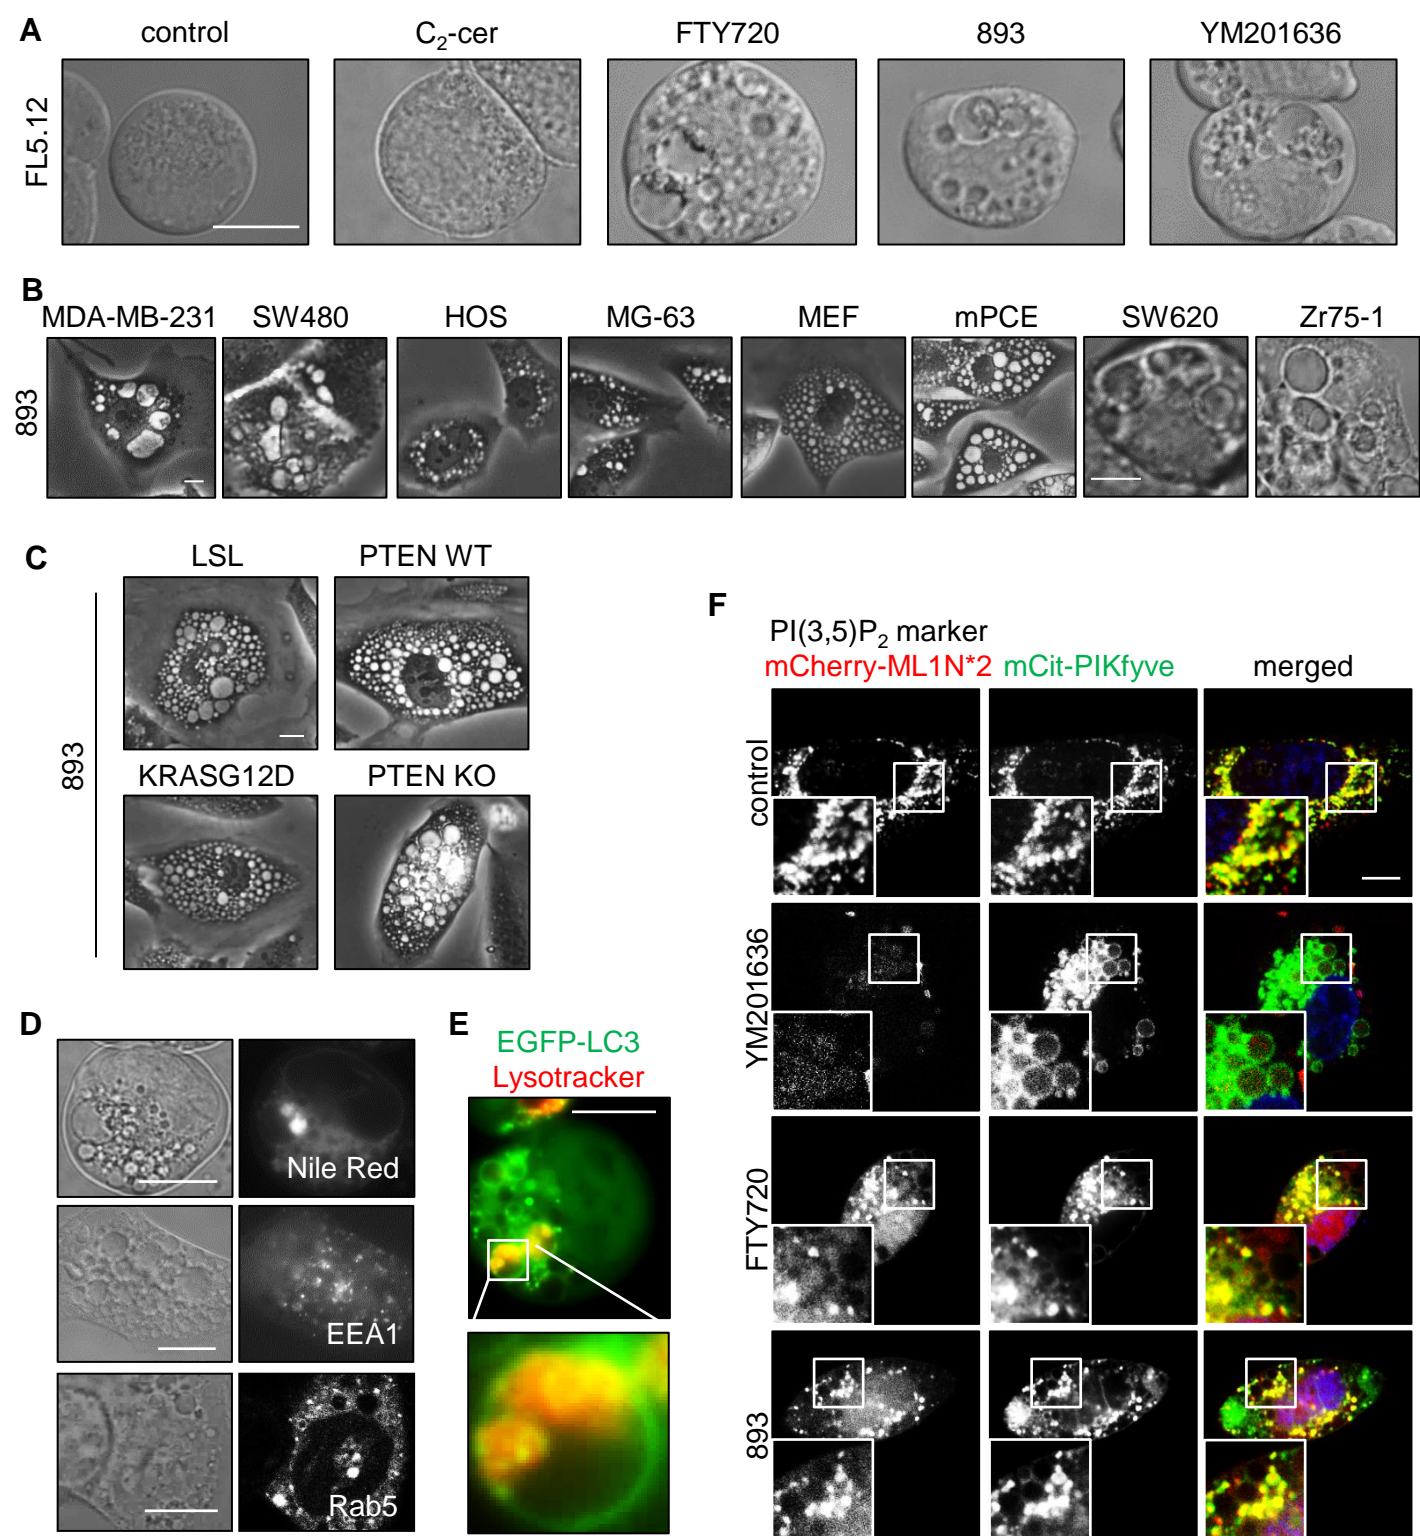

**Supplemental Figure 3: Characterization of FTY720- and SH-BC-893-induced vacuolation.** (A,B) FL5.12 cells (A) or the indicated cell lines (B) were treated with drugs for 2 h or 6 h, respectively (50  $\mu$ M C<sub>2</sub>-ceramide, 5  $\mu$ M FTY720, 5  $\mu$ M SH-BC-893, 800 nM YM201636). (C) Control (LSL), K-RasG12D-expressing, PTEN WT, or PTEN KO MEFs treated with SH-BC-893 for 6 h. (D) FL5.12, HeLa, or MEFs treated with FTY720 and stained with Nile Red, probed with EEA1 antibodies, or expressing GFP-Rab5, respectively. (E) GFP-LC3-expressing FL5.12 treated with 2.5  $\mu$ M FTY720 for 2 h and stained with Lysotracker Red. (F) HeLa cells expressing the PI(3,5)P<sub>2</sub> marker mCherry-ML1N\*2 and mCit-PIKfyve were treated with 800 nM YM201636, 5  $\mu$ M FTY720, or 5  $\mu$ M SH-BC-893 for 6 h. Scale bar, 10  $\mu$ m.

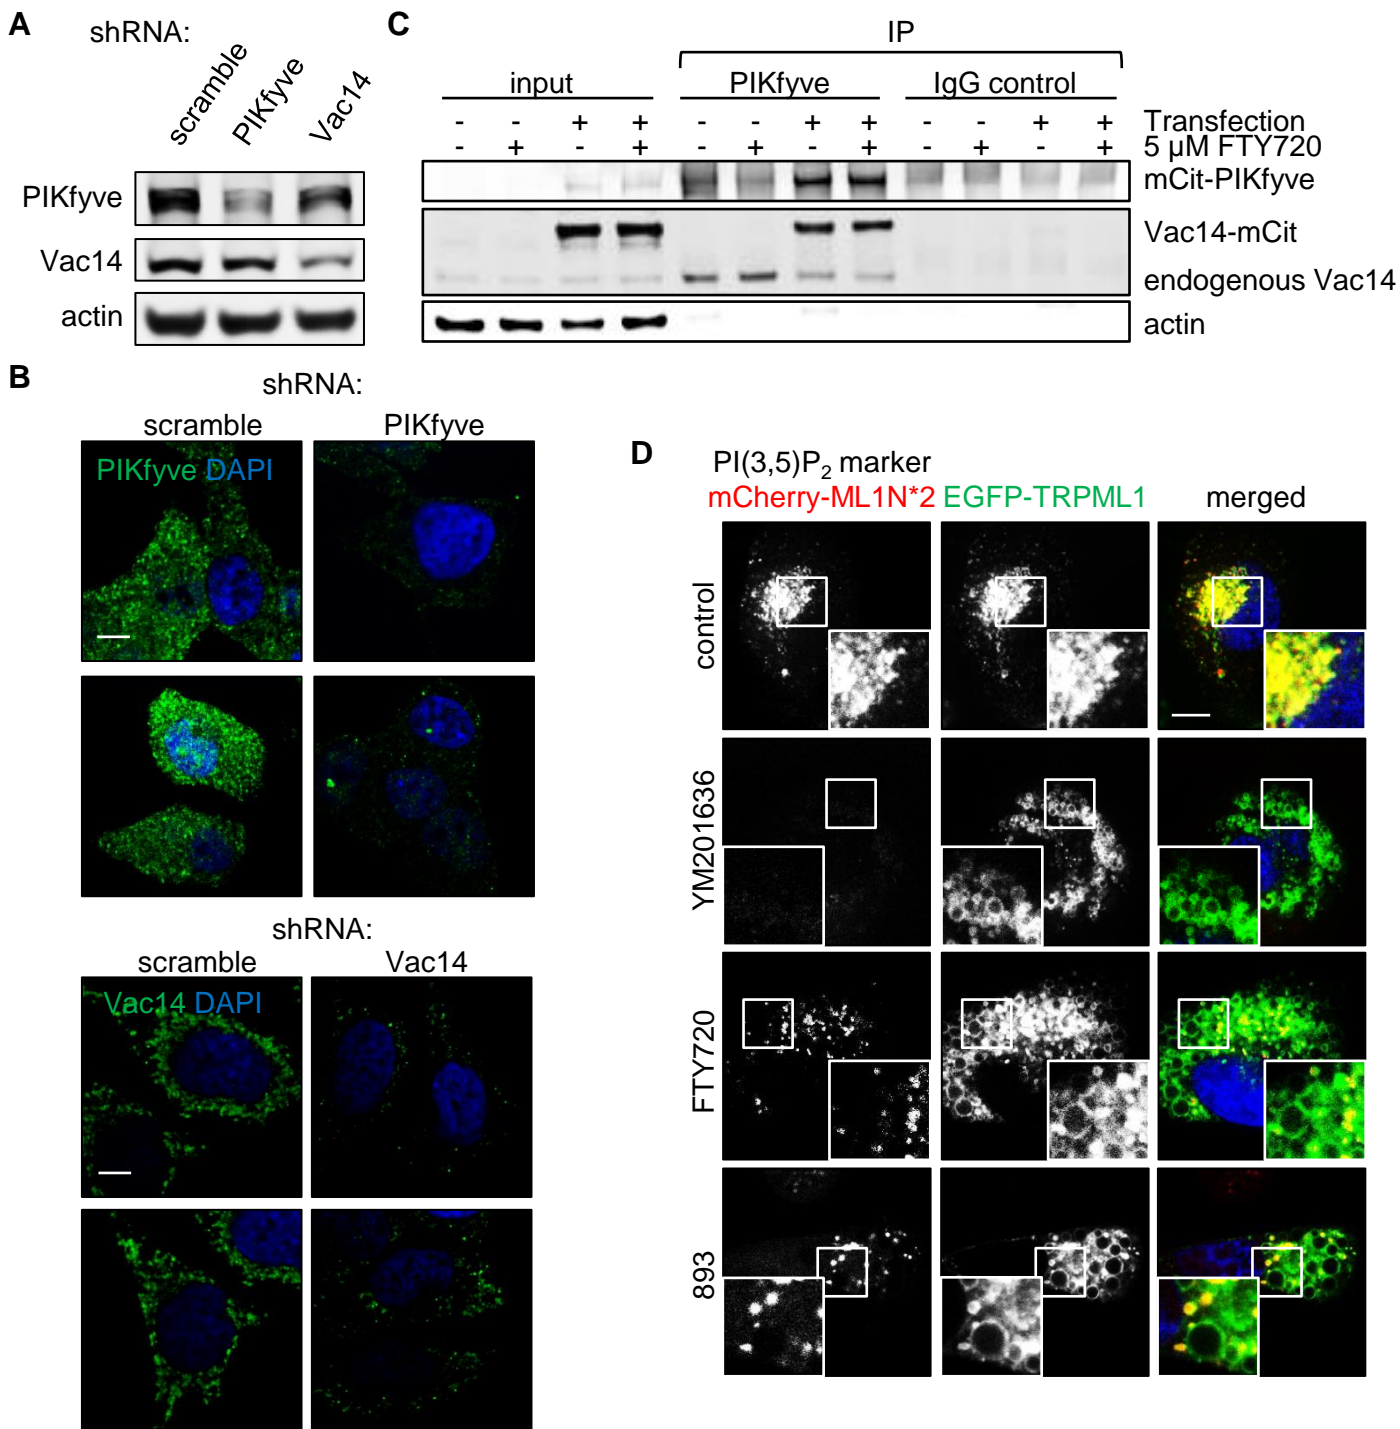

**Supplemental Figure 4: FTY720 and SH-BC-893 mislocalizes PIKfyve.** (A,B) HeLa cells transfected with shRNA scramble, PIKfyve, or Vac14 were evaluated by western blotting (A) or by confocal immunofluorescence microscopy (B). (C) PIKfyve immunoprecipitation from mCitrine-PIKfyve- and Vac14-mCitrine-expressing HeLa cells treated with FTY720. (D) HeLa cells expressing PI(3,5)P<sub>2</sub> marker mCherry-ML1N\*2 and EGFP-TRPML1 were treated with 800 nM YM201636, 5  $\mu$ M FTY720, or 5  $\mu$ M SH-BC-893 for 6 h. Scale bar, 10  $\mu$ m.

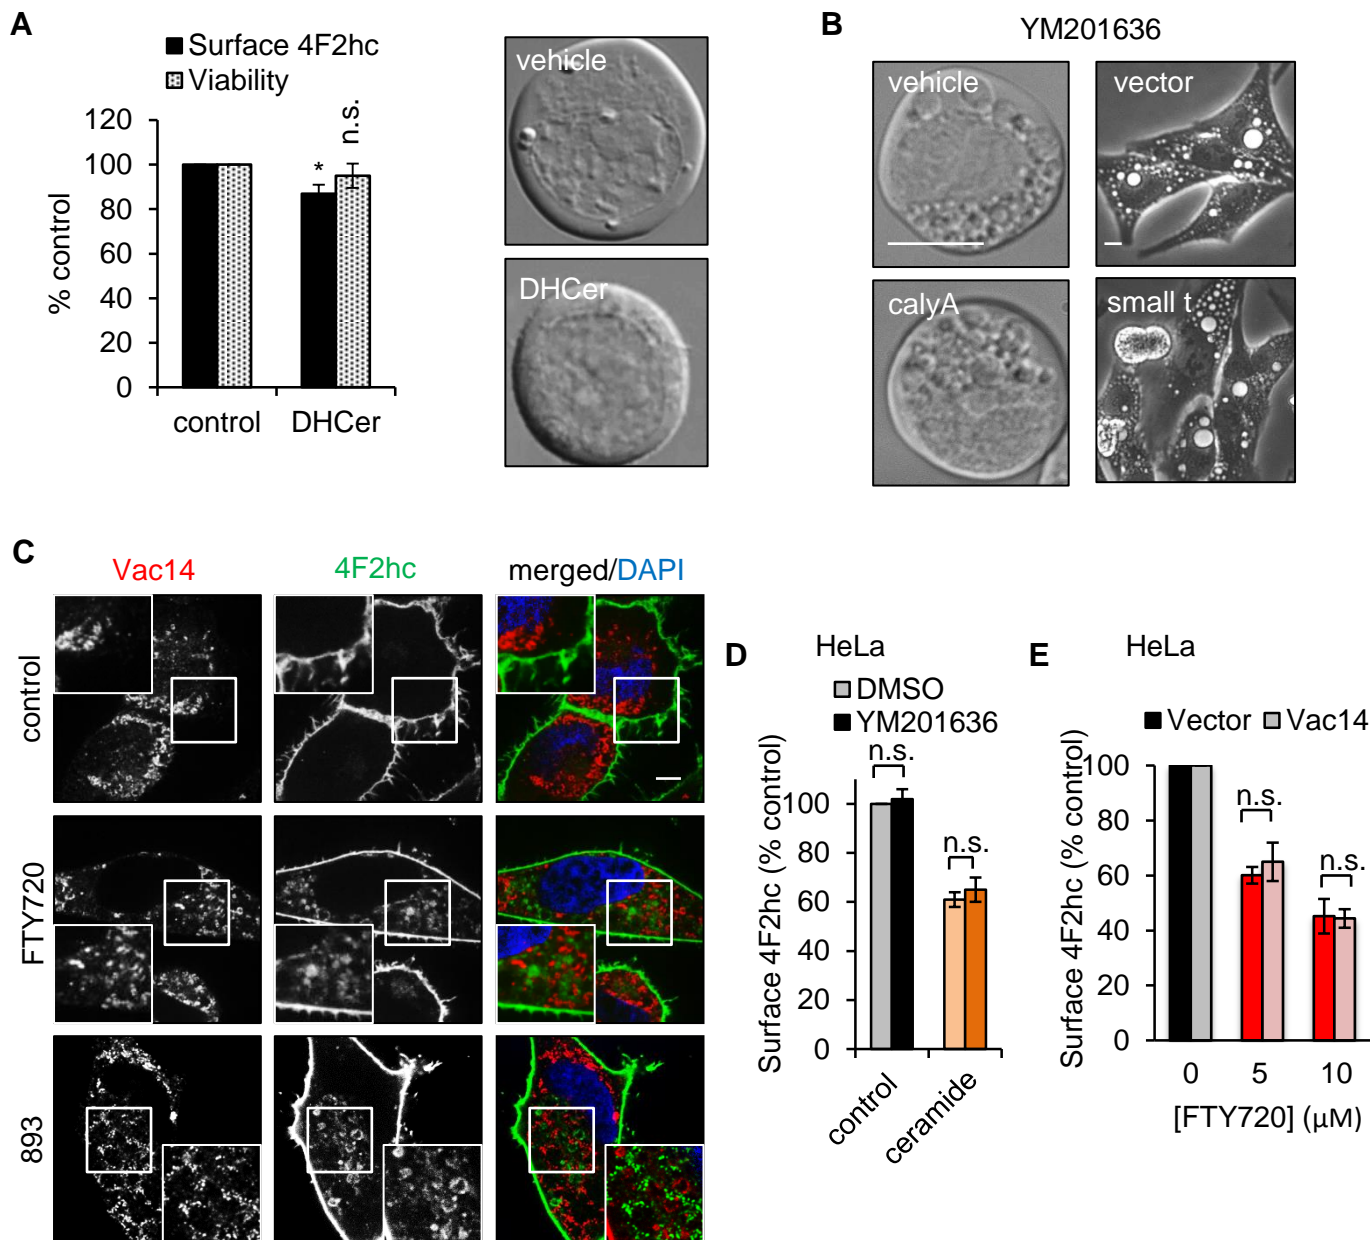

**Supplemental Figure 5: FTY720 and SH-BC-893 induce surface nutrient transporter loss and vacuolation via two distinct PP2A-dependent mechanisms.** (A) Surface 4F2hc levels and viability (left) and vacuolation (right) of FL5.12 cells treated with 50 μM dihydro-C<sub>2</sub>-ceramide (DHCer). Statistics comparing to respective controls. (B) FL5.12 cells (left) treated with 800 nM YM201636 +/- 5 nM calyculinA (calyA) or HeLa cells (right) expressing SV40 small t antigen treated with YM201636. (C) HeLa cells were treated with 5 μM FTY720 or SH-BC-893, stained as indicated, and evaluated by confocal microscopy. (D) Surface 4F2hc levels in HeLa cells treated with DMSO, 800 nM YM201636, 25 μM C<sub>2</sub>-ceramide, or with YM201636 + C<sub>2</sub>-ceramide. (E) Surface 4F2hc levels in vector or Vac14 over-expressing HeLa cells treated with FTY720 for 6 h. Scale bar, 10 μm. Means +/- SEM n ≥ 3. Using Student's unpaired, two-tailed t-test, \*,  $P < 0.05$ ; n.s., not significant ( $P > 0.05$ ).

**A**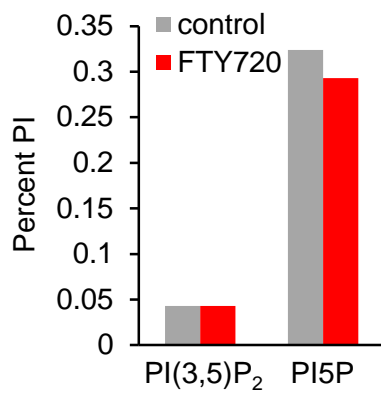**B**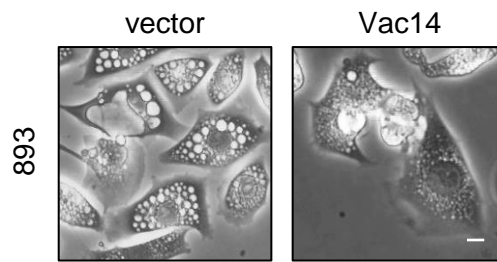

**Supplemental Figure 6: SH-BC-893 blocks autophagic flux.** (A) PI(3,5)P<sub>2</sub> and PI5P levels in MEF cells treated with FTY720 expressed as a percentage of total phosphatidylinositol. Average from two independent experiments. (B) Mouse prostate cancer epithelial cells expressing vector or Vac14 treated with 5  $\mu$ M SH-BC-893. Scale bar, 10  $\mu$ m.

**A**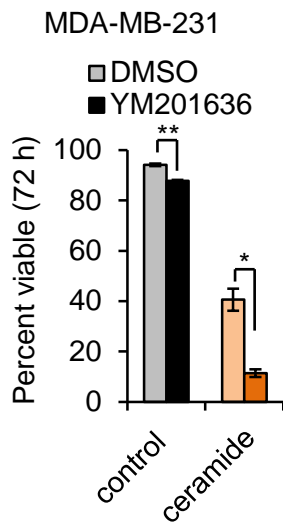**B**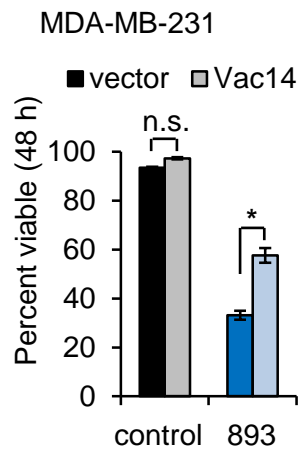

**Supplemental Figure 7: Vacuolation enhances cell death.** (A) Viability of MDA-MB-231 cells treated with DMSO, 800 nM YM201636, 25  $\mu$ M C<sub>2</sub>-ceramide, or with YM201636 + C<sub>2</sub>-ceramide. (B) Viability of vector or Vac14 over-expressing MDA-MB-231 cells treated with SH-BC-893. Means  $\pm$  SEM,  $n \geq 3$ . Using Student's unpaired, two-tailed t-test, \*,  $P < 0.05$ ; \*\*,  $P < 0.01$ ; n.s., not significant ( $P > 0.05$ ).

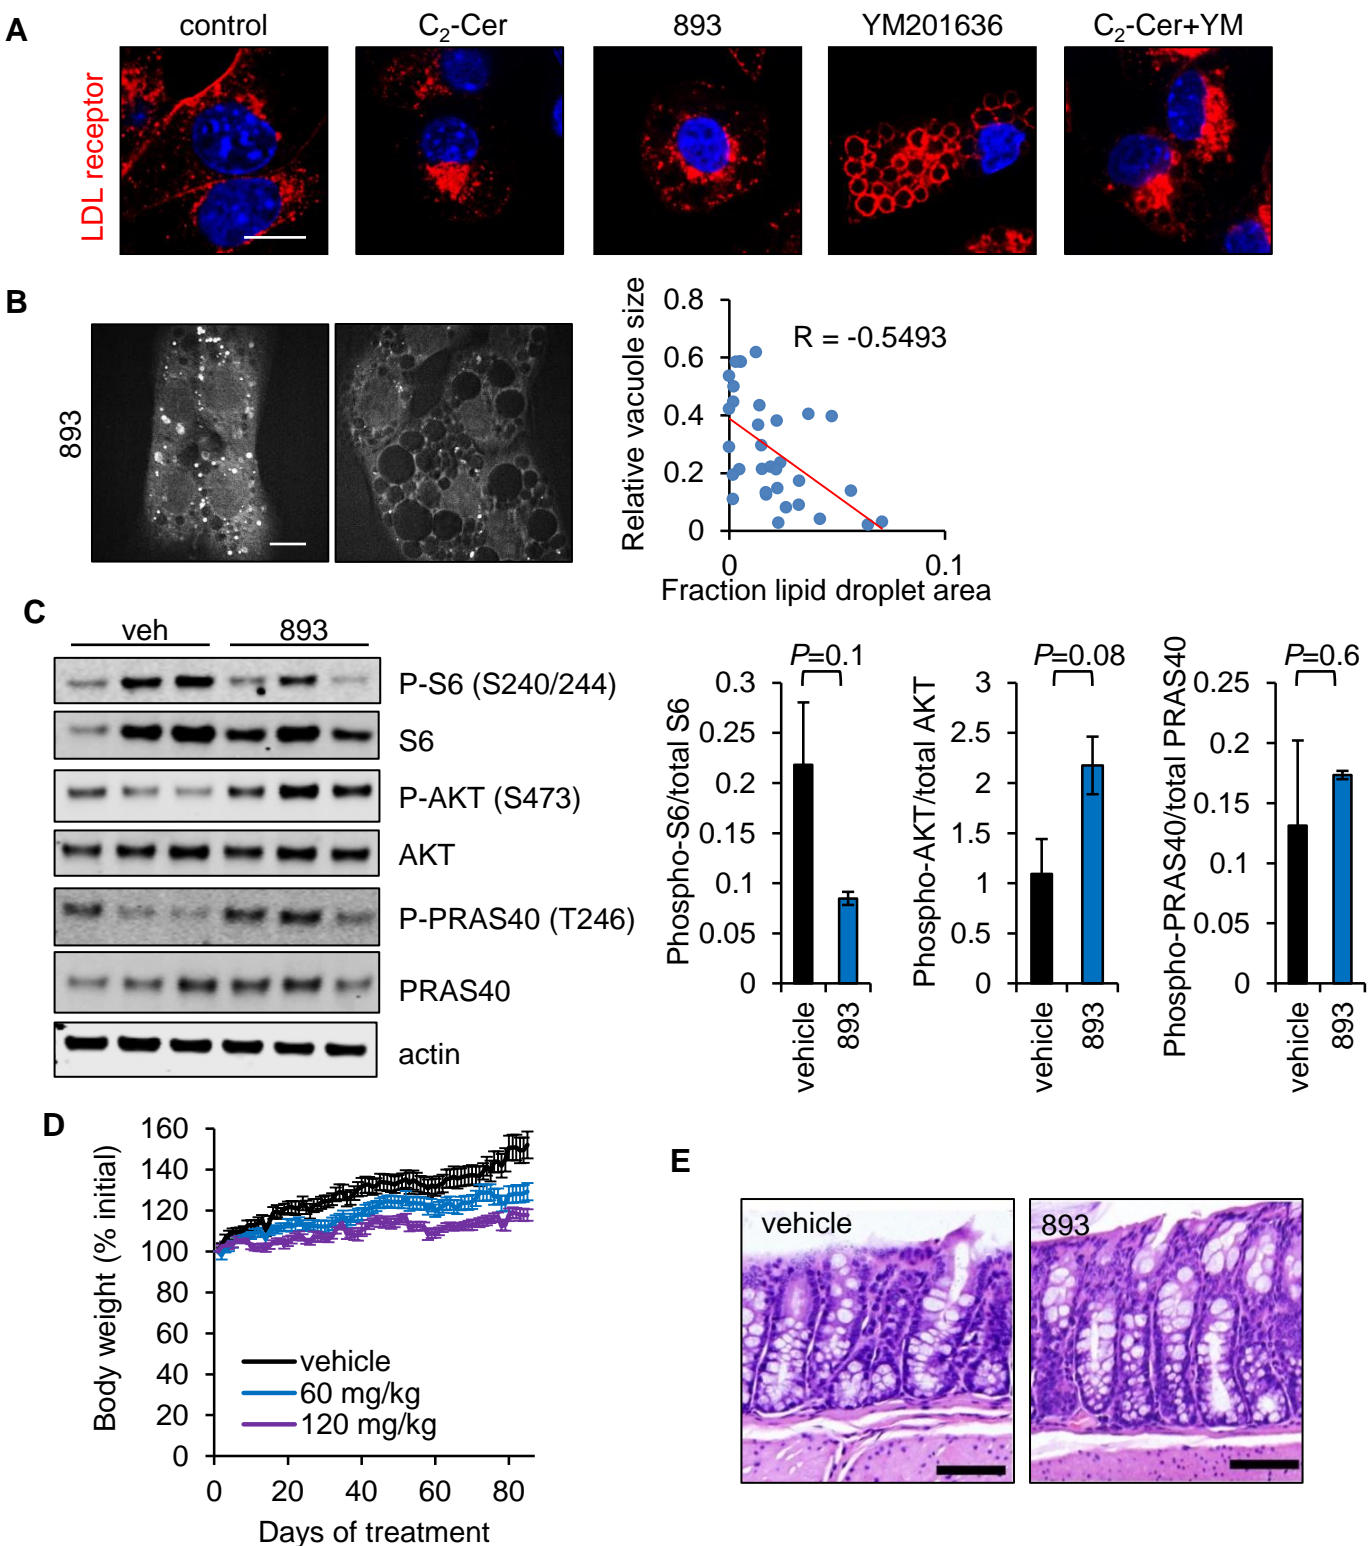

**Supplemental Figure 8: SH-BC-893 is selectively toxic to cancer cells.** (A) mPCE cells treated with indicated compounds and stained for the LDL receptor. Scale bar, 20  $\mu\text{m}$ . (B) CARS images of lipid droplets in mPCE cells treated with SH-BC-893. Linear regression plot representing correlation between vacuole size and lipid droplet amount in mPCE cells treated with SH-BC-893. R, Pearson Coefficient. Scale bar, 20  $\mu\text{m}$ . (C) Western blotting of tumors from vehicle or SH-BC-893 treated mice in Fig. 8J. On the right, ratio of phosphorylated over total S6, AKT, and PRAS40 from tumors excised from pDKO mice treated with vehicle or 120 mg/kg SH-BC-893. Means  $\pm$  SEM,  $n \geq 3$ ,  $P$ -values using Student's unpaired, two-tailed t-test. (D) Percent change in body weight of pDKO mice treated with vehicle, 60 mg/kg, or 120 mg/kg SH-BC-893. (E) Histology of intestinal crypts in mice treated with 120 mg/kg SH-BC-893 for 11 weeks. Scale bar, 100  $\mu\text{m}$ .

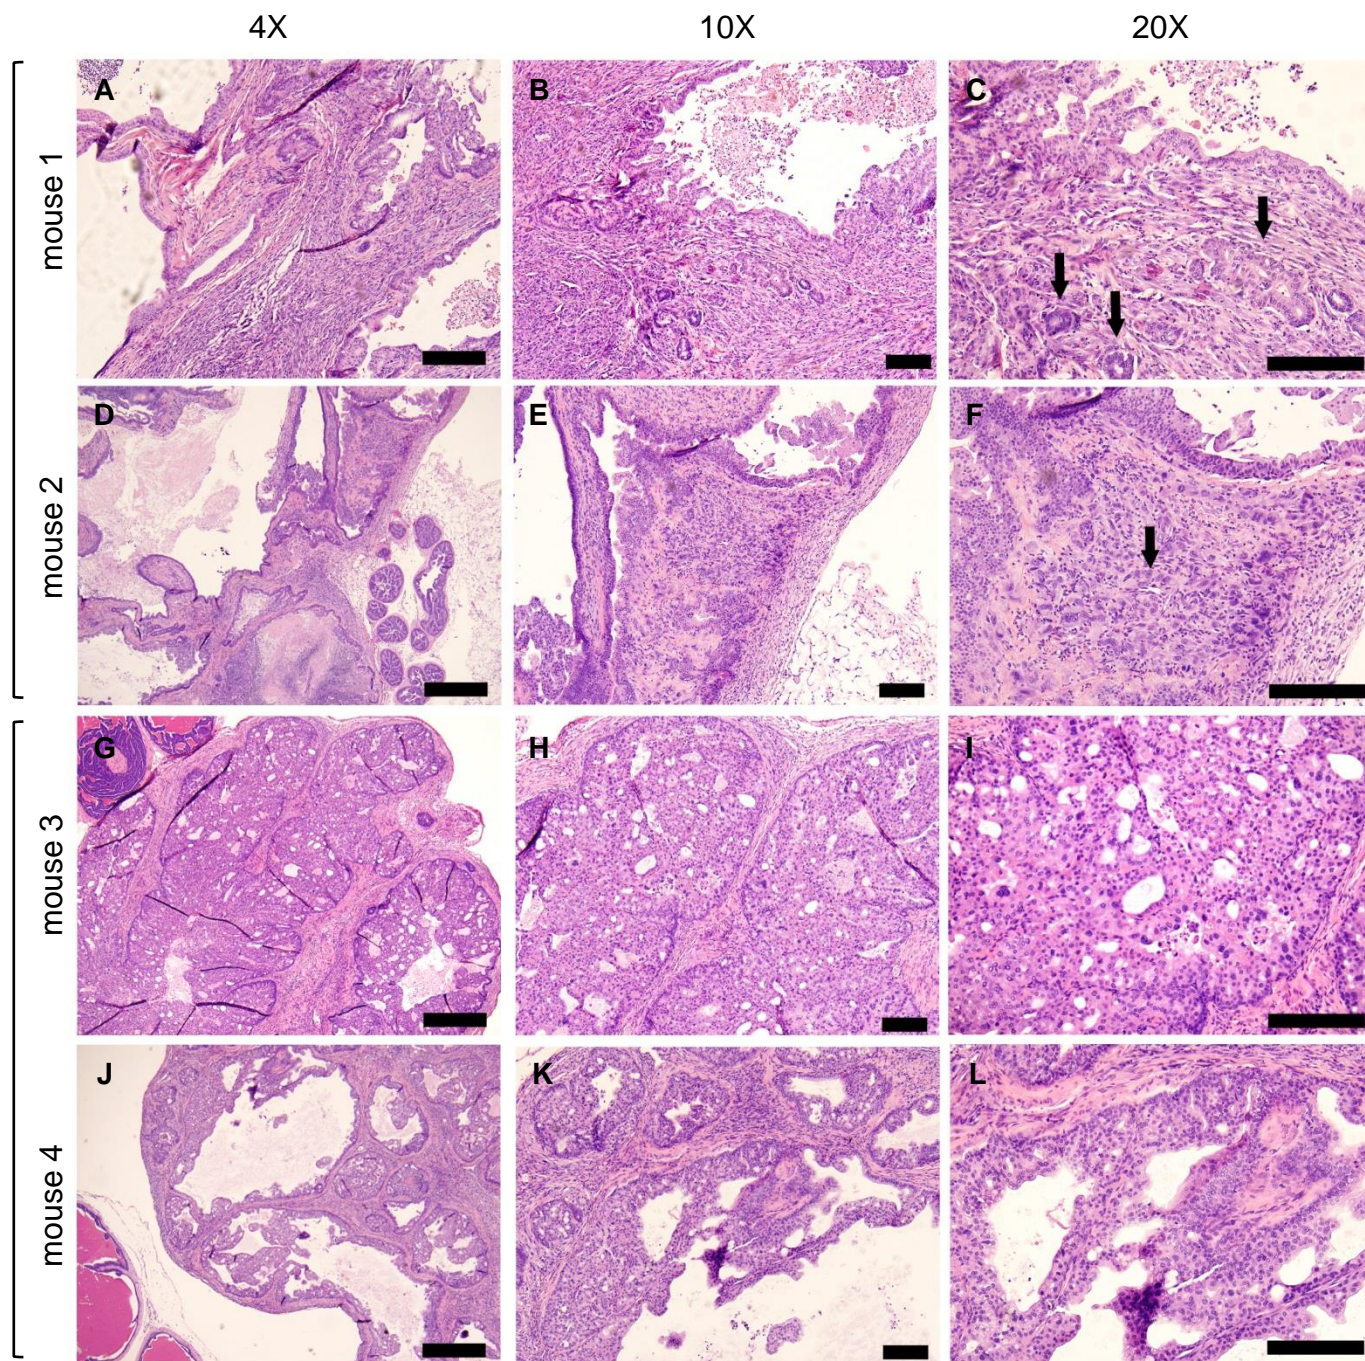

**Supplemental Figure 9: SH-BC-893 inhibits prostate cancer progression.** (A-L) H&E staining of p53<sup>-/-</sup> PTEN<sup>-/-</sup> prostates excised from mice treated with vehicle (A-F) or 120 mg/kg SH-BC-893 (G-L) for 11 weeks. At high power, arrows indicate invasive glandular structures in a reactive stroma (C,F). Prostates in SH-BC-893-treated mice exhibited exclusively prostatic intraepithelial neoplasia (G-L) rather than the locally invasive adenocarcinomas seen in vehicle controls (A-F) indicating that SH-BC-893 slowed disease progression. Although prostates of treated mice still developed prostatic intraepithelial neoplasia, no invasive component was identified in SH-BC-893-treated pDKO mice. The intraepithelial proliferation present in treated mice showed much lower degrees of cellular pleomorphism, hyperchromasia, and nuclear atypia. Scale bars = 500 mm (4X), 100 mm (10X & 20X).

**Supplemental Table 1: Blood chemistry of vehicle or SH-BC-893-treated pDKO mice at sacrifice.** Means +/- SEM are shown, n=4. AP: alkaline phosphatase; SGPT (ALT): serum glutamic-pyruvic transaminase (alanine aminotransferase); SGOT (AST): serum glutamic oxaloacetic transaminase (aspartate aminotransferase ); CPK: creatine phosphokinase; BUN: blood urea nitrogen; CR: creatinine; CHOL: cholesterol; Ca<sup>2+</sup>: Calcium; P: phosphorus; HCO<sub>3</sub><sup>-</sup>: bicarbonate.

### Blood Chemistry Panel

|               | AP       | SGPT (ALT) | SGOT (AST) | CPK           | ALBUMIN | TOTAL PROTEIN | GLOBULIN |
|---------------|----------|------------|------------|---------------|---------|---------------|----------|
| vehicle       | 93 ± 5.4 | 65 ± 10.4  | 809 ± 200  | 5,017 ± 1199  | 3 ± 0.2 | 6 ± 0.3       | 3 ± 0.13 |
| 60 mg/kg 893  | 77 ± 7.8 | 78 ± 25    | 640 ± 136  | 5,340 ± 2366  | 3 ± 0.2 | 5 ± 0.4       | 2 ± 0.18 |
| 120 mg/kg 893 | 83 ± 6.2 | 91 ± 17.2  | 907 ± 171  | 10,441 ± 3014 | 3 ± 0.1 | 6 ± 0.2       | 2 ± 0.03 |

|               | TOTAL BILIRUBIN | BUN      | CR   | CHOL       | GLUCOSE  | Ca <sup>2+</sup> | P        | HCO <sub>3</sub> <sup>-</sup> |
|---------------|-----------------|----------|------|------------|----------|------------------|----------|-------------------------------|
| vehicle       | 0.2 ± 0.03      | 29 ± 3.1 | <0.2 | 187 ± 8.8  | 264 ± 43 | 11 ± 0.8         | 13 ± 0.6 | 19 ± 5.8                      |
| 60 mg/kg 893  | 0.1 ± 0         | 19 ± 1.1 | <0.2 | 134 ± 15.8 | 282 ± 24 | 10 ± 0.7         | 11 ± 1.0 | 20 ± 3.2                      |
| 120 mg/kg 893 | 0.2 ± 0.03      | 23 ± 1.5 | <0.2 | 107 ± 7.5  | 307 ± 28 | 10 ± 0.1         | 13 ± 0.1 | 17 ± 2.8                      |

**Supplemental Table 2: Complete blood count of vehicle or SH-BC-893-treated pDKO mice at sacrifice.** Means +/- SEM are shown, n=4. WBC: white blood cells; RBC: red blood cells; HCT: hematocrit

**Complete Blood Count**

|               | WBC<br>[10 <sup>3</sup> cells/ $\mu$ L] | % neutrophil | % lymphocyte | RBC<br>[M/ $\mu$ L] | HCT        |
|---------------|-----------------------------------------|--------------|--------------|---------------------|------------|
| vehicle       | 5 $\pm$ 1                               | 16 $\pm$ 5   | 76 $\pm$ 7   | 9 $\pm$ 0           | 38 $\pm$ 3 |
| 60 mg/kg 893  | 5 $\pm$ 1                               | 14 $\pm$ 3   | 77 $\pm$ 4   | 8 $\pm$ 1           | 32 $\pm$ 5 |
| 120 mg/kg 893 | 8 $\pm$ 1                               | 19 $\pm$ 5   | 73 $\pm$ 5   | 9 $\pm$ 1           | 41 $\pm$ 3 |

Supplemental Figure 4C

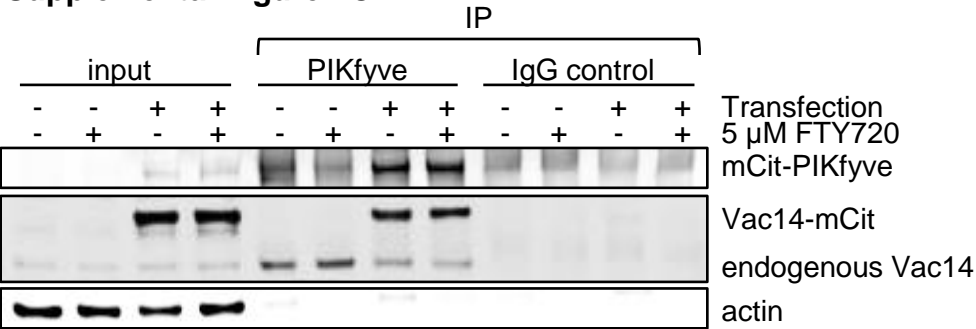

Full unedited gel for Supplemental Figure 4C

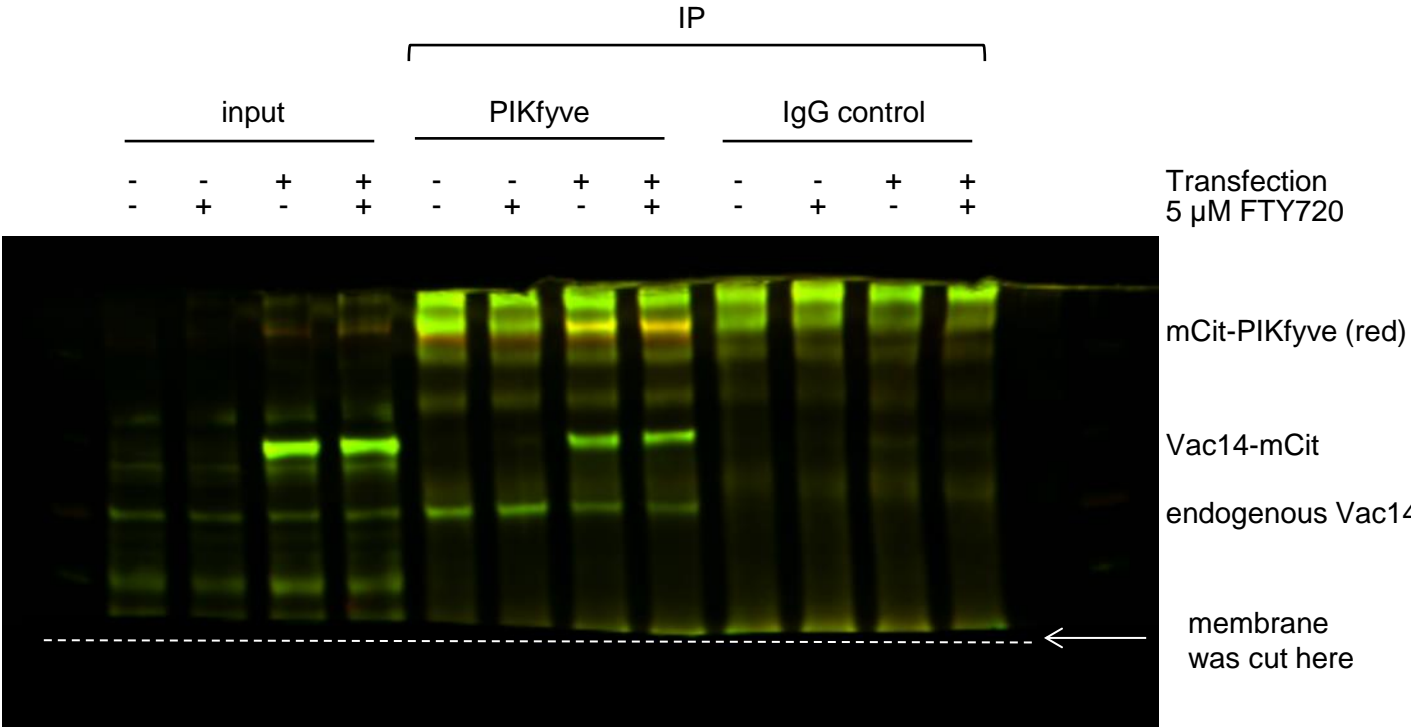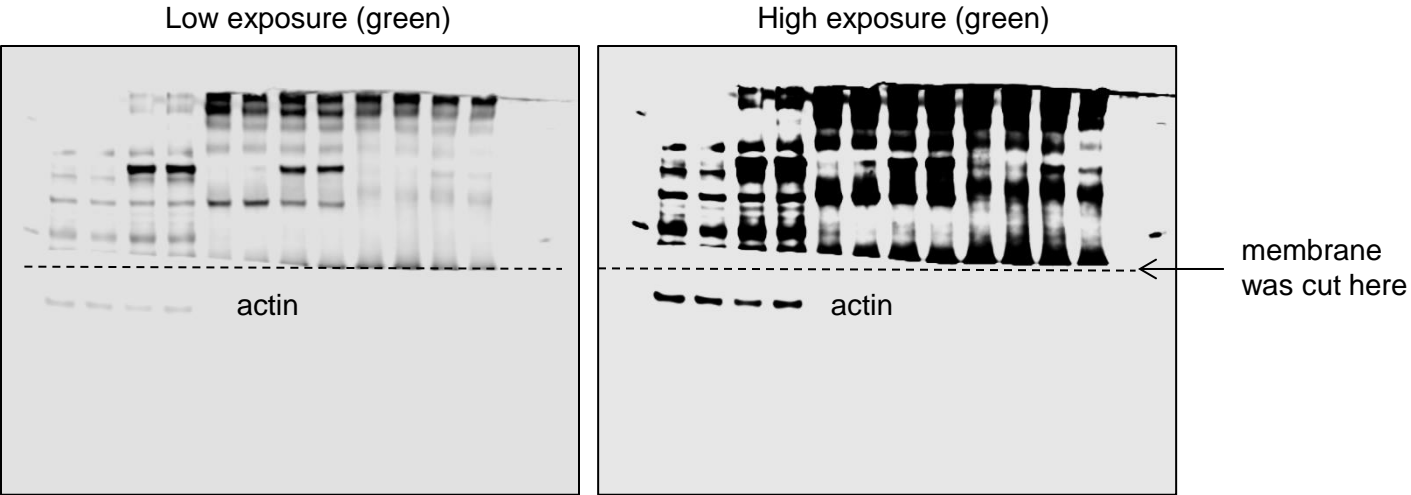

Supplemental Figure 4A

shRNA:

scramble  
PIKfyve  
Vac14

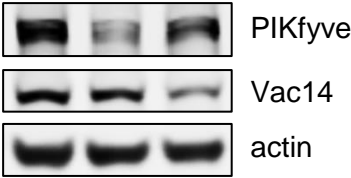

Full unedited gel for Supplemental Figure 4A  
(Experiment 1 is shown on Supplemental Figure 4A)

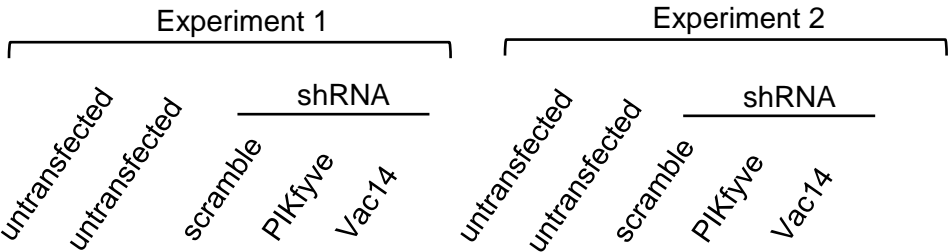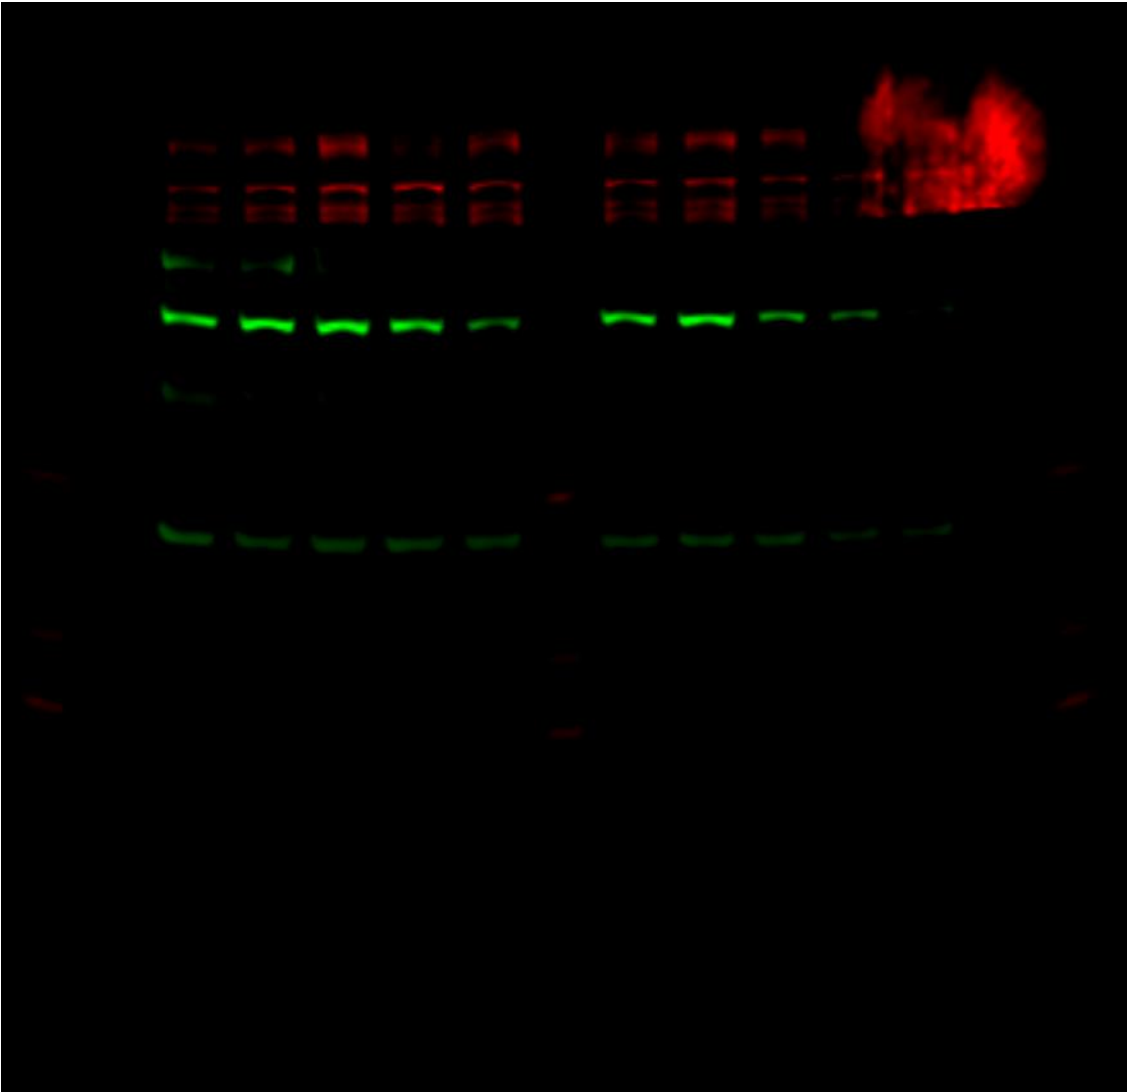

PIKfyve  
Non-specific bands  
Vac14  
actin

Supplemental Figure 8C

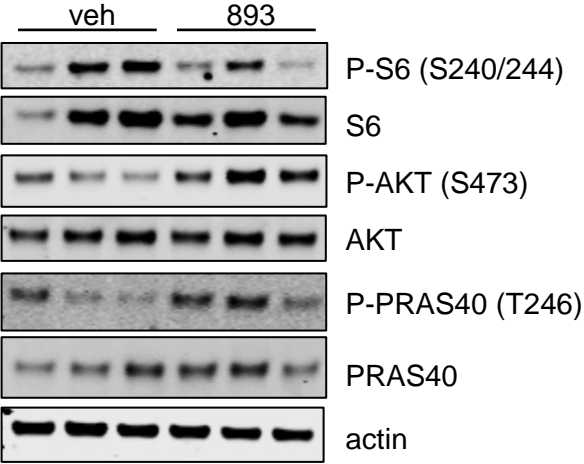

Full unedited gel for Supplemental Figure 8C

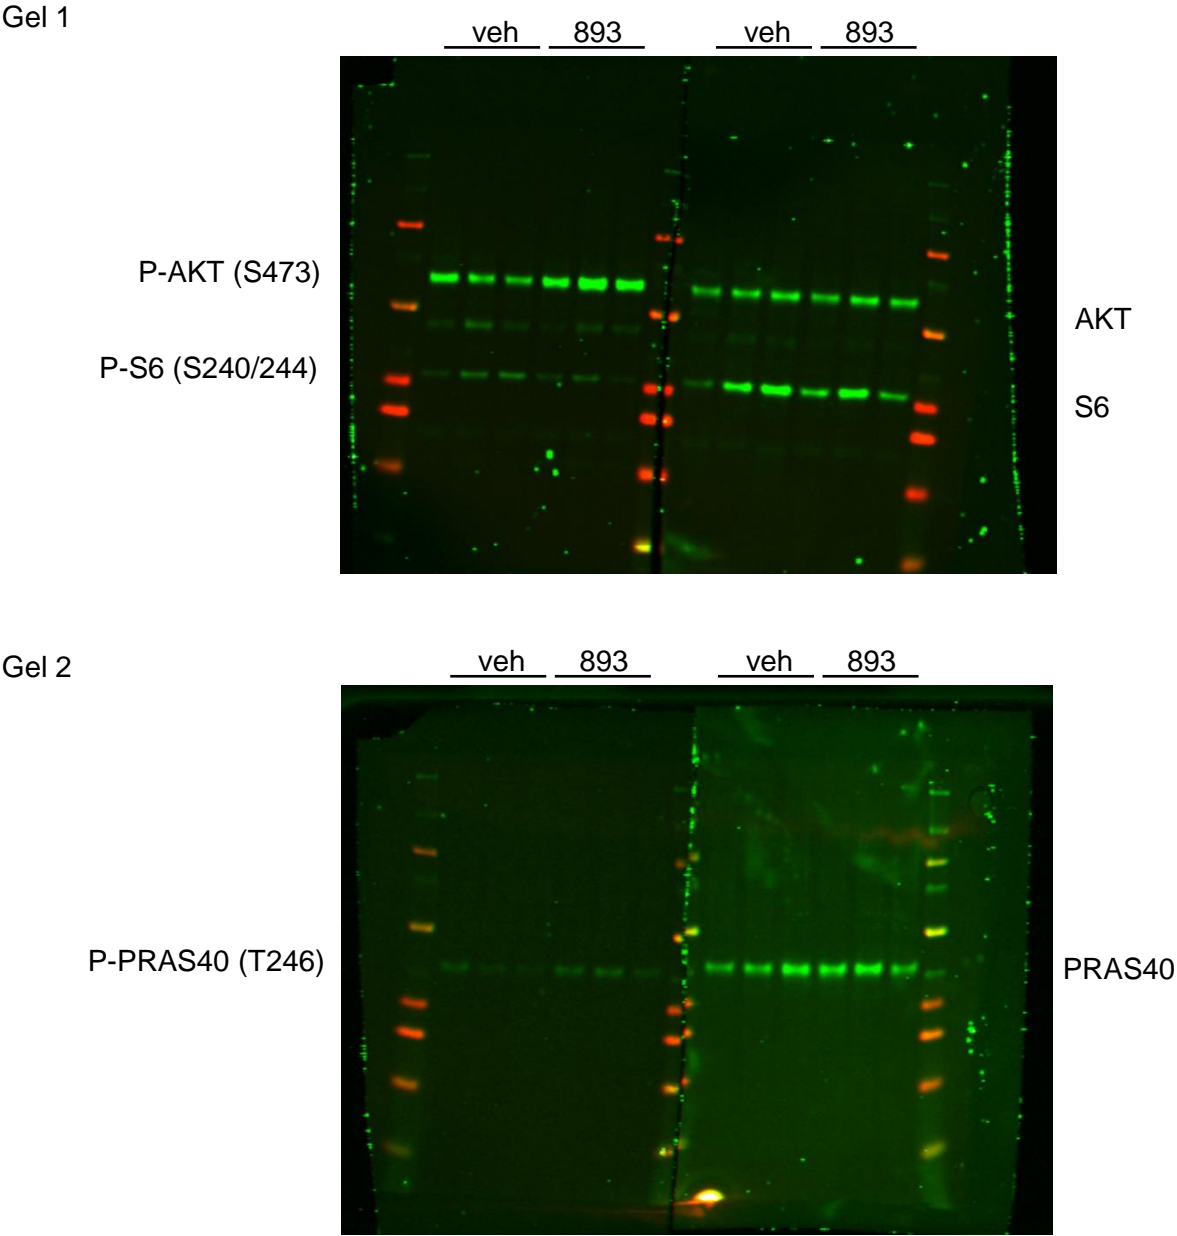

Full unedited gel for Supplemental Figure 8C continued

Gel 3

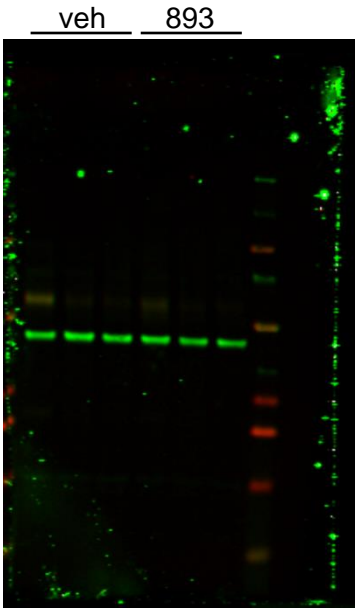

Supplement: jci-126-87148-s001.pdf [file jci-126-87148-s001.pdf]
